# Supplementary material for: Using peripheral immune-inflammatory blood markers in tumors treated with immune checkpoint inhibitors: An INVIDIa-2 study sub-analysis
Source: PubMed Central journal article supplement — iScience. 2023 Sep 22;26(11):107970. doi: 10.1016/j.isci.2023.107970 (PMC10583024; doi:10.1016/j.isci.2023.107970), 2023-09-22
Supplement: mmc1.pdf [file mmc1.pdf]

## **Supplemental information**

### **Using peripheral immune-inflammatory blood markers in tumors treated with immune checkpoint inhibitors: An INVIDIa-2 study sub-analysis**

**Shobana Anpalakhan, Alessio Signori, Alessio Cortellini, Elena Verzoni, Raffaele Giusti, Giuseppe Aprile, Paola Ermacora, Annamaria Catino, Stefania Pipitone, Marilena Di Napoli, Vieri Scotti, Francesca Mazzoni, Pamela F. Guglielmini, Antonello Veccia, Marco Maruzzo, Giovanni Schinzari, Chiara Casadei, Francesco Grossi, Mimma Rizzo, Vincenzo Montesarchio, Francesco Verderame, Manlio Mencoboni, Fable Zustovich, Lucia Fratino, Caterina Accettura, Saverio Cinieri, Carlo Alberto Tondini, Andrea Camerini, Maria Chiara Banzi, Mariella Sorarù, Paolo Andrea Zucali, Francesca Vignani, Serena Ricciardi, Antonio Russo, Agnese Cosenza, Massimo Di Maio, Ugo De Giorgi, Sandro Pignata, Diana Giannarelli, Carmine Pinto, Sebastiano Buti, Giuseppe Fornarini, Sara Elena Rebuzzi, Pasquale Rescigno, Alfredo Addeo, Giuseppe L. Banna, and Melissa Bersanelli**

## Supplementary Data

**Supplementary Table 1: Validation of other clinical factors**

|                                               | All sample<br>(n=1169)        | Lung<br>(n=635)               | RCC<br>(n=200)               | Melanoma<br>(n=150)           |
|-----------------------------------------------|-------------------------------|-------------------------------|------------------------------|-------------------------------|
|                                               | HR (95% CI);<br>p-value       | HR (95% CI);<br>p-value       | HR (95% CI);<br>p-value      | HR (95% CI);<br>p-value       |
| <b>LDH</b>                                    |                               |                               |                              |                               |
| <upper limit of normal                        | 1.00 (ref)                    | 1.00 (ref)                    | 1.00 (ref)                   | 1.00 (ref)                    |
| ≥upper limit of normal                        | 1.41 (1.14-1.75);<br>p=0.001  | 1.39 (1.04-1.87);<br>p=0.027  | 1.32 (0.79-2.20);<br>p=0.29  | 1.41 (0.71-2.80);<br>p=0.33   |
|                                               | c-index = 0.533               | c-index = 0.523               | c-index = 0.542              | c-index = 0.544               |
| <b>Gender</b>                                 |                               |                               |                              |                               |
| Female                                        | 1.00 (ref)                    | 1.00 (ref)                    | 1.00 (ref)                   | 1.00 (ref)                    |
| Male                                          | 1.18 (0.97-1.43);<br>p=0.10   | 1.14 (0.88-1.46);<br>p=0.32   | 1.35 (0.77-2.37);<br>p=0.29  | 0.69 (0.37-1.27);<br>p=0.23   |
| <b>ECOG PS</b>                                |                               |                               |                              |                               |
| 0                                             | 1.00 (ref)                    | 1.00 (ref)                    | 1.00 (ref)                   | 1.00 (ref)                    |
| 1                                             | 1.87 (1.56-2.25);<br>p<0.001  | 1.79 (1.42-2.26);<br>p<0.001  | 2.28 (1.39-3.76);<br>p=0.001 | 1.57 (0.78-3.15);<br>p=0.21   |
| 2                                             | 3.66 (2.52-5.30);<br>p<0.001  | 3.81 (2.35-6.18);<br>p<0.001  | 4.34 (1.90-9.89);<br>p<0.001 | 6.19 (2.10-18.27);<br>p=0.001 |
| 3                                             | 4.39 (1.41-13.74);<br>p=0.011 | 3.87 (0.96-15.65);<br>p=0.058 | -                            | -                             |
| <b>Smoking status</b>                         |                               |                               |                              |                               |
| Never                                         | 1.00 (ref)                    | 1.00(ref)                     | 1.00 (ref)                   | 1.00 (ref)                    |
| Former                                        | 1.10 (0.89-1.36);<br>p=0.39   | 0.78 (0.56-1.08);<br>p=0.14   | 0.61 (0.32-1.17);<br>p=0.14  | 0.88 (0.42-1.88);<br>p=0.75   |
| Current                                       | 1.14 (0.90-1.46);<br>p=0.28   | 0.74 (0.52-1.06);<br>p=0.10   | 1.08 (0.59-1.99);<br>p=0.80  | 0.76 (0.27-2.18);<br>p=0.61   |
| <b>Pre-treatment steroids<br/>(Yes vs No)</b> | 1.28 (1.06-1.54);<br>p=0.010  | 1.15 (0.91-1.45);<br>p=0.24   | 0.85 (0.51-1.44);<br>p=0.55  | 1.68 (0.86-3.27);<br>p=0.13   |
| <b>Bone metastases<br/>(Yes vs No)</b>        | 1.29 (1.07-1.55);<br>p=0.007  | 1.34 (1.05-1.71);<br>p=0.020  | 1.10 (0.68-1.76);<br>p=0.70  | 1.52 (0.76-3.02);<br>p=0.23   |
| <b>Brain metastases<br/>(Yes vs No)</b>       | 1.18 (0.94-1.49);<br>p=0.15   | 1.10 (0.82-1.50);<br>p=0.52   | 1.01 (0.48-2.11);<br>p=0.99  | 2.00 (1.00-3.97);<br>p=0.049  |
| <b>Liver metastases<br/>(Yes vs No)</b>       | 1.71 (1.35-2.16);<br>p<0.001  | 2.16 (1.58-2.95);<br>p<0.001  | 1.75 (0.97-3.15);<br>p=0.063 | 2.28 (1.19-4.38);<br>p=0.013  |

Abbreviations: 95% CI, 95% confidence interval; ECOG, Eastern Cooperative Oncology Group; HR, hazard ratio; LDH, lactate dehydrogenase; n, number; RCC, renal cell carcinoma

**Supplementary Table 2: Validation of original LIPI score**

|            | Whole sample (n=1169)        | Lung cancer (n=635)       | RCC (n=200)               | Melanoma (n=150)           |
|------------|------------------------------|---------------------------|---------------------------|----------------------------|
| LIPI score | HR (95% CI); p-value         | HR (95% CI); p-value      | HR (95% CI); p-value      | HR (95% CI); p-value       |
| 0          | 1.00 (ref)                   | 1.00 (ref)                | 1.00 (ref)                | 1.00 (ref)                 |
| 1          | 1.51 (1.18-1.91);<br>p=0.001 | 1.54 (1.10-2.16); p=0.011 | 1.19 (0.69-2.05); p=0.52  | 1.42 (0.67-3.01); p=0.37   |
| 2          | 2.44 (1.79-3.33);<br>p<0.001 | 2.29 (1.53-3.43); p<0.001 | 2.76 (1.21-6.31); p=0.016 | 6.05 (2.13-17.12); p=0.001 |
| c-index    | 0.564                        | 0.559                     | 0.563                     | 0.591                      |

Abbreviations: 95% CI, 95% confidence interval; HR, hazard ratio; LIPI score, lung immune prognostic index; n, number; RCC, renal cell carcinoma

**Supplementary Table 3: Validation of LIPI score with dNLR replaced by ROC-derived SII value**

|                   | <b>Whole sample (n=1169)</b> | <b>Lung cancer (n=635)</b>  | <b>RCC (n=200)</b>          | <b>Melanoma (n=150)</b>     |
|-------------------|------------------------------|-----------------------------|-----------------------------|-----------------------------|
| <b>LIPI score</b> | <b>HR (95% CI); p-value</b>  | <b>HR (95% CI); p-value</b> | <b>HR (95% CI); p-value</b> | <b>HR (95% CI); p-value</b> |
| 0                 | 1.00 (ref)                   | 1.00 (ref)                  | 1.00 (ref)                  | 1.00 (ref)                  |
| 1                 | 1.66 (1.21-2.27); p=0.002    | 1.49 (0.96-2.32); p=0.078   | 1.02 (0.52-2.01); p=0.96    | 1.56 (0.66-3.70); p=0.31    |
| 2                 | 2.54 (1.79-3.36); p<0.001    | 2.01 (1.29-3.11); p=0.002   | 2.03 (1.04-3.97); p=0.038   | 2.57 (1.05-6.26); p=0.038   |
| c-index           | 0.578                        | 0.554                       | 0.589                       | 0.605                       |

Abbreviations: 95% CI, 95% confidence interval; HR, hazard ratio; LIPI score, lung immune prognostic index; n, number; RCC, renal cell carcinoma

**Supplementary Table 4: Validation of LIPI score with dNLR replaced by ROC-derived NLR value**

|                   | <b>Whole sample (n=1169)</b> | <b>Lung cancer (n=635)</b>  | <b>RCC (n=200)</b>          | <b>Melanoma (n=150)</b>     |
|-------------------|------------------------------|-----------------------------|-----------------------------|-----------------------------|
| <b>LIPI score</b> | <b>HR (95% CI); p-value</b>  | <b>HR (95% CI); p-value</b> | <b>HR (95% CI); p-value</b> | <b>HR (95% CI); p-value</b> |
| 0                 | 1.00 (ref)                   | 1.00 (ref)                  | 1.00 (ref)                  | 1.00 (ref)                  |
| 1                 | 1.54 (1.13-2.09); p=0.006    | 1.61 (1.04-2.51); p=0.035   | 0.92 (0.48-1.76); p=0.81    | 1.54 (0.69-3.44); p=0.29    |
| 2                 | 2.33 (1.72-3.16); p<0.001    | 2.22 (1.44-3.45); p<0.001   | 1.87 (0.96-3.64); p=0.065   | 1.59 (0.64-3.97); p=0.32    |
| c-index           | 0.579                        | 0.566                       | 0.569                       | 0.552                       |

Abbreviations: 95% CI, 95% confidence interval; HR, hazard ratio; LIPI score, lung immune prognostic index; n, number; RCC, renal cell carcinoma

**Supplementary Table 5: Validation of original LIPS-3 score**

|                     | <b>Whole sample (n=1169)</b> | <b>Lung cancer (n=635)</b>  | <b>RCC (n=200)</b>          | <b>Melanoma (n=150)</b>      |
|---------------------|------------------------------|-----------------------------|-----------------------------|------------------------------|
| <b>LIPS-3 score</b> | <b>HR (95% CI); p-value</b>  | <b>HR (95% CI); p-value</b> | <b>HR (95% CI); p-value</b> | <b>HR (95% CI); p-value</b>  |
| 0                   | 1.00 (ref)                   | 1.00 (ref)                  | 1.00 (ref)                  | 1.00 (ref)                   |
| 1                   | 1.53 (1.27-1.84); p<0.001    | 1.34 (1.05-1.70); p=0.017   | 1.16 (0.72-1.89); p=0.54    | 1.43 (0.78-2.61); p=0.25     |
| 2                   | 8.14 (4.41-15.0); p<0.001    | 8.89 (4.11-19.23); p<0.001  | 5.89 (1.40-24.82); p=0.016  | 21.00 (2.58-171.00); p=0.004 |
| c-index             | 0.566                        | 0.552                       | 0.535                       | 0.561                        |

Abbreviations: 95% CI, 95% confidence interval; HR, hazard ratio; LIPS-3 score, lung immune-oncology prognostic score; n, number; RCC, renal cell carcinoma

**Supplementary Table 6: Validation of LIPS-3 score with literature-reported cut-off NLR value replaced by ROC-derived NLR value**

|                     | <b>Whole sample (n=1169)</b> | <b>Lung cancer (n=635)</b>  | <b>RCC (n=200)</b>          | <b>Melanoma (n=150)</b>      |
|---------------------|------------------------------|-----------------------------|-----------------------------|------------------------------|
| <b>LIPS-3 score</b> | <b>HR (95% CI); p-value</b>  | <b>HR (95% CI); p-value</b> | <b>HR (95% CI); p-value</b> | <b>HR (95% CI); p-value</b>  |
| 0                   | 1.00 (ref)                   | 1.00 (ref)                  | 1.00 (ref)                  | 1.00 (ref)                   |
| 1                   | 1.63 (1.35-1.98); p<0.001    | 1.48 (1.14-1.92); p=0.003   | 1.33 (0.80-2.20); p=0.27    | 1.35 (0.74-2.47); p=0.33     |
| 2                   | 9.51 (5.27-17.18); p<0.001   | 11.14 (5.35-23.21); p<0.001 | 6.47 (1.52-27.60); p=0.012  | 20.71 (2.54-168.94); p=0.005 |
| c-index             | 0.571                        | 0.562                       | 0.546                       | 0.554                        |

Abbreviations: 95% CI, 95% confidence interval; HR, hazard ratio; LIPS-3 score, lung immune-oncology prognostic score; n, number; RCC, renal cell carcinoma

**Supplementary Table 7: Validation of LIPS-3 score with literature-reported NLR replaced by ROC-derived SII**

|                     | <b>Whole sample (n=1169)</b> | <b>Lung cancer (n=635)</b>  | <b>RCC (n=200)</b>          | <b>Melanoma (n=150)</b>      |
|---------------------|------------------------------|-----------------------------|-----------------------------|------------------------------|
| <b>LIPS-3 score</b> | <b>HR (95% CI); p-value</b>  | <b>HR (95% CI); p-value</b> | <b>HR (95% CI); p-value</b> | <b>HR (95% CI); p-value</b>  |
| 0                   | 1.00 (ref)                   | 1.00 (ref)                  | 1.00 (ref)                  | 1.00 (ref)                   |
| 1                   | 1.71 (1.40-2.10); p<0.001    | 1.43 (1.10-1.86); p=0.008   | 1.76 (1.02-3.05); p=0.043   | 1.89 (1.02-3.52); p=0.044    |
| 2                   | 6.93 (3.74-12.85); p<0.001   | 10.04 (4.60-21.89); p<0.001 | 1.76 (0.23-13.26); p=0.58   | 44.53 (8.73-227.05); p<0.001 |
| c-index             | 0.571                        | 0.553                       | 0.564                       | 0.609                        |

Abbreviations: 95% CI, 95% confidence interval; HR, hazard ratio; LIPS-3 score, lung immune-oncology prognostic score; n, number; RCC, renal cell carcinoma

**Supplementary Table 8: The REMARK checklist – Data S1**

| Item to be reported          |                                                                                                                                                                                                                                                                                                                          | Reported on Page Number/Line Number | Reported on Section/Paragraph |
|------------------------------|--------------------------------------------------------------------------------------------------------------------------------------------------------------------------------------------------------------------------------------------------------------------------------------------------------------------------|-------------------------------------|-------------------------------|
| <b>INTRODUCTION</b>          |                                                                                                                                                                                                                                                                                                                          |                                     |                               |
| 1                            | State the marker examined, the study objectives, and any pre-specified hypotheses.                                                                                                                                                                                                                                       | 6/1-4                               | Background                    |
| <b>MATERIALS AND METHODS</b> |                                                                                                                                                                                                                                                                                                                          |                                     |                               |
| Patients                     |                                                                                                                                                                                                                                                                                                                          |                                     |                               |
| 2                            | Describe the characteristics (e.g., disease stage or co-morbidities) of the study patients, including their source and inclusion and exclusion criteria.                                                                                                                                                                 | 6/8-12<br>9/4-5                     | Methods<br>Results, Table 1   |
| 3                            | Describe treatments received and how chosen (e.g., randomized or rule-based).                                                                                                                                                                                                                                            | N/A                                 | INVIDIa-2 study               |
| Specimen characteristics     |                                                                                                                                                                                                                                                                                                                          |                                     |                               |
| 4                            | Describe type of biological material used (including control samples) and methods of preservation and storage.                                                                                                                                                                                                           | N/A                                 |                               |
| Assay methods                |                                                                                                                                                                                                                                                                                                                          |                                     |                               |
| 5                            | Specify the assay method used and provide (or reference) a detailed protocol, including specific reagents or kits used, quality control procedures, reproducibility assessments, quantitation methods, and scoring and reporting protocols. Specify whether and how assays were performed blinded to the study endpoint. | 7/13-24<br>8/1-3                    | Methods<br>Methods            |
| Study design                 |                                                                                                                                                                                                                                                                                                                          |                                     |                               |
| 6                            | State the method of case selection, including whether prospective or retrospective and whether stratification or matching (e.g., by stage of disease or age) was used. Specify the time period from which cases were taken, the end of the follow-up period, and the median follow-up time.                              | 6/8-13                              | Methods                       |
| 7                            | Precisely define all clinical endpoints examined.                                                                                                                                                                                                                                                                        | 6/23-24, 7/1-11                     | Methods                       |
| 8                            | List all candidate variables initially examined or considered for inclusion in models.                                                                                                                                                                                                                                   | 8/5-15                              | Methods                       |
| 9                            | Give rationale for sample size; if the study was designed to detect a specified effect size, give the target power and effect size.                                                                                                                                                                                      | N/A                                 |                               |
| Statistical analysis methods |                                                                                                                                                                                                                                                                                                                          |                                     |                               |
| 10                           | Specify all statistical methods, including details of any variable selection procedures and other model-building issues, how model assumptions were verified, and how missing data were handled.                                                                                                                         | 7/23-24<br>8/1-15                   | Methods<br>Methods            |
| 11                           | Clarify how marker values were handled in the analyses; if relevant, describe methods used for cutpoint determination.                                                                                                                                                                                                   | 7/13-21                             | Methods                       |
| 2-1                          |                                                                                                                                                                                                                                                                                                                          |                                     |                               |
| <b>RESULTS</b>               |                                                                                                                                                                                                                                                                                                                          |                                     |                               |
| Data                         |                                                                                                                                                                                                                                                                                                                          |                                     |                               |
| 12                           | Describe the flow of patients through the study, including the number of patients included in each stage of the analysis (a diagram may be helpful) and reasons for dropout. Specifically, both overall and for each subgroup extensively examined report the numbers of patients and the number of events.              | 9/1-4                               | Results                       |
| 13                           | Report distributions of basic demographic characteristics (at least age and sex), standard (disease-specific) prognostic variables, and tumor marker, including numbers of missing values.                                                                                                                               | 9/4-5, Table 1                      | Results, Table 1              |

| Analysis and presentation |                                                                                                                                                                                                                                                                                                                                         |                                              |                                    |
|---------------------------|-----------------------------------------------------------------------------------------------------------------------------------------------------------------------------------------------------------------------------------------------------------------------------------------------------------------------------------------|----------------------------------------------|------------------------------------|
| 14                        | Show the relation of the marker to standard prognostic variables.                                                                                                                                                                                                                                                                       | 12/5-23, 13/1-23, 14/1-21                    | Results                            |
| 15                        | Present univariable analyses showing the relation between the marker and outcome, with the estimated effect (e.g., hazard ratio and survival probability). Preferably provide similar analyses for all other variables being analyzed. For the effect of a tumor marker on a time-to-event outcome, a Kaplan-Meier plot is recommended. | 11/6-22                                      | Results, Table 2, Table 3, Table 5 |
| 16                        | For key multivariable analyses, report estimated effects (e.g., hazard ratio) with confidence intervals for the marker and, at least for the final model, all other variables in the model.                                                                                                                                             | 12/1-3                                       | Results, Table 4                   |
| 17                        | Among reported results, provide estimated effects with confidence intervals from an analysis in which the marker and standard prognostic variables are included, regardless of their statistical significance.                                                                                                                          | 9/7-23, 10/1-24, 11/1-4, Table 2, Table 3    | Results, Table 2, Table 3          |
| 18                        | If done, report results of further investigations, such as checking assumptions, sensitivity analyses, and internal validation.                                                                                                                                                                                                         | Supplementary Table 1                        | Supplementary Table 1              |
| DISCUSSION                |                                                                                                                                                                                                                                                                                                                                         |                                              |                                    |
| 19                        | Interpret the results in the context of the pre-specified hypotheses and other relevant studies; include a discussion of limitations of the study.                                                                                                                                                                                      | 14/24-25, 15/1-24, 16/1-24, 17/1-24, 18/1-18 | Discussion                         |
| 20                        | Discuss implications for future research and clinical value.                                                                                                                                                                                                                                                                            | 18/15-23                                     | Discussion, Conclusion             |

**From:** McShane LM, Altman DG, Sauerbrei W, Taube SE, Gion M, Clark GM: Reporting recommendations for tumor marker prognostic studies (REMARK). J Natl Cancer Inst 2005; 97: 1180-1184.
